# Supplementary material for: Strong N–H⋯N hydrogen bonds and weak N–H⋯S C interactions in controlling the structure of the co-crystals of dithiooxamide with nitrogen heterocycles
Source: Royal Society of Chemistry journal article supplement (doi:10.1039/b806061d), 2008-01-01
Supplement: b806061d.pdf [file b806061d.pdf]

**Strong N–H···N hydrogen bonds and weak N–H···S=C  
interactions in controlling structure of co-crystals of  
dithiooxamide with nitrogen heterocycles**

**Barbara Piotrkowska,<sup>a</sup> Aleksandra Wasilewska,<sup>a</sup> Maria Gdaniec <sup>\*b</sup> and Tadeusz Poloński <sup>\*a</sup>**

<sup>a</sup> Department of Chemistry, Gdańsk University of Technology, 80-952 Gdansk, Poland; E-mail: tadpol@chem.pg.gda.pl

<sup>b</sup> Faculty of Chemistry, A. Mickiewicz University, 60-780 Poznań, Poland; E-mail: magdan@amu.edu.pl

Supplementary Material

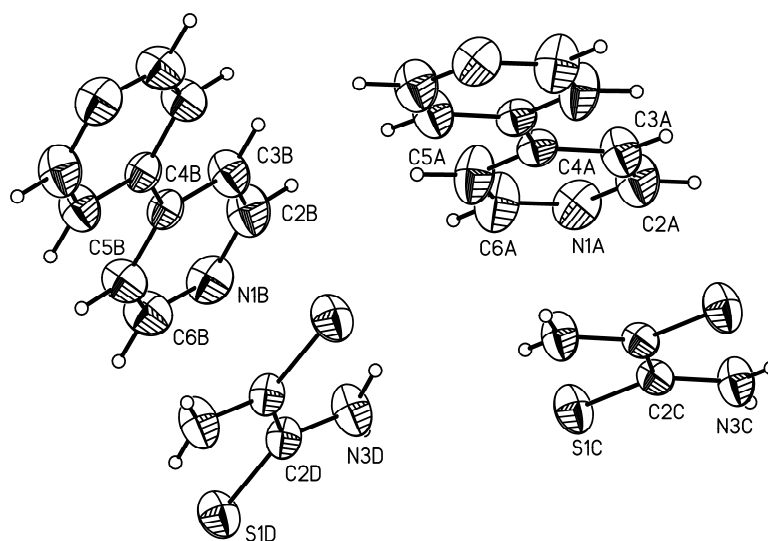

Fig. 1s Ortep drawing of **dtox·1** with displacement ellipsoids shown at the 50% probability level

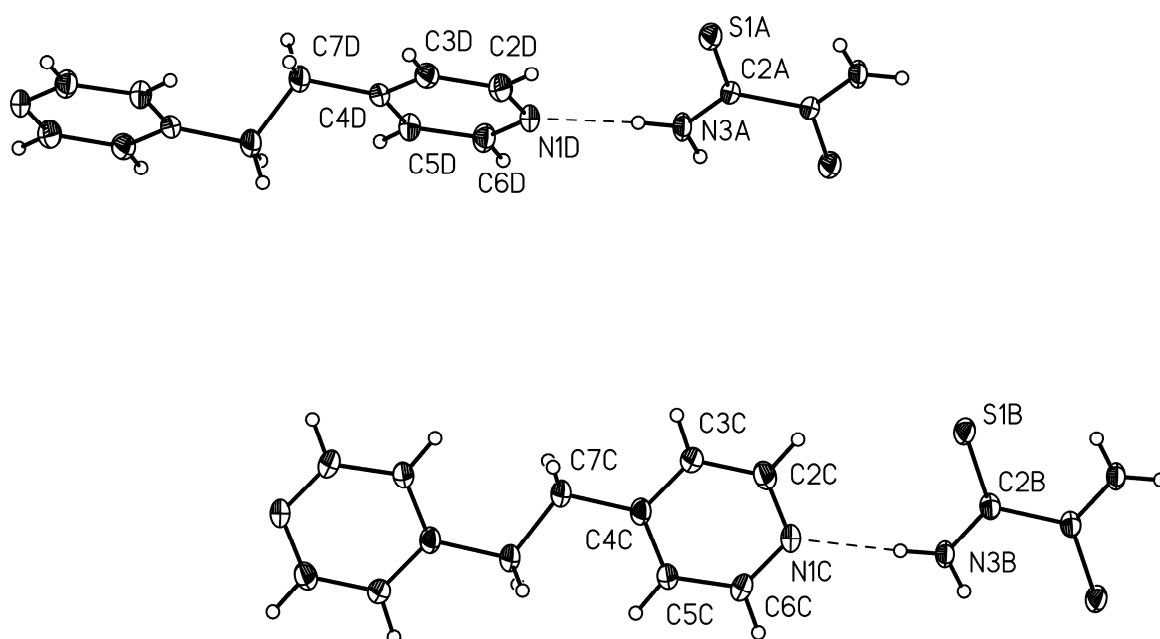

Fig. 2s Ortep drawing of **dtox·2** with displacement ellipsoids shown at the 50% probability level

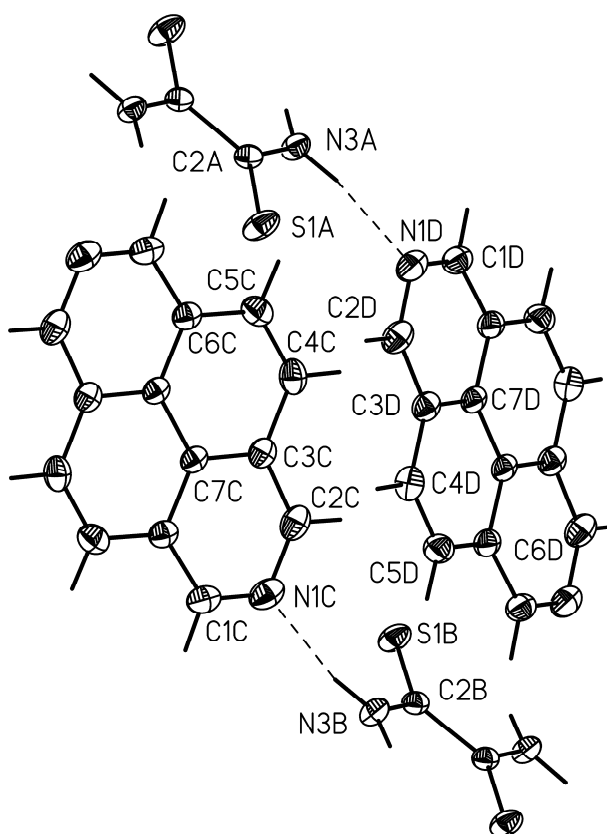

Fig. 3s Ortep drawing of **dtox·3** with displacement ellipsoids shown at the 50% probability level

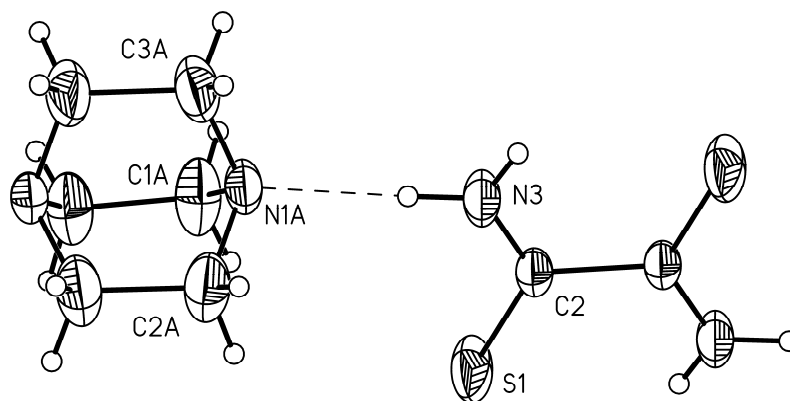

Fig. 4s Ortep drawing of **dtox·4rt** with displacement ellipsoids shown at the 50% probability level

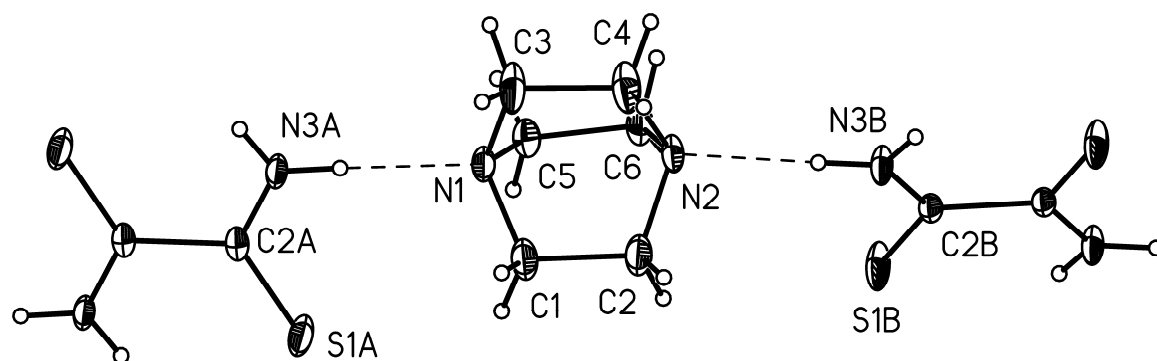

Fig. 5s Ortep drawing of **dtox·4lt** with displacement ellipsoids shown at the 50% probability level

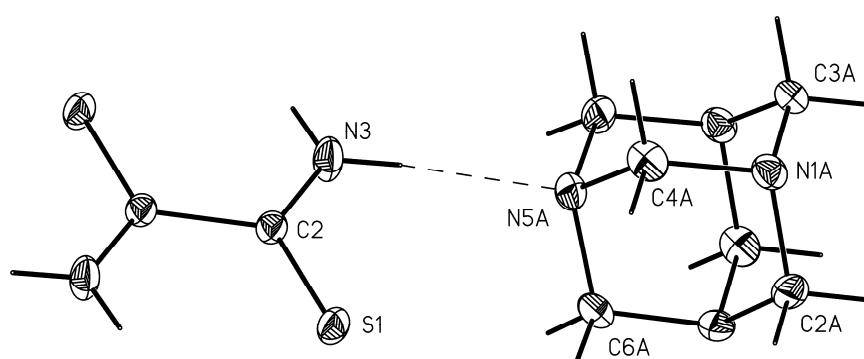

Fig. 6s Ortep drawing of **dtox·5** with displacement ellipsoids shown at the 50% probability level

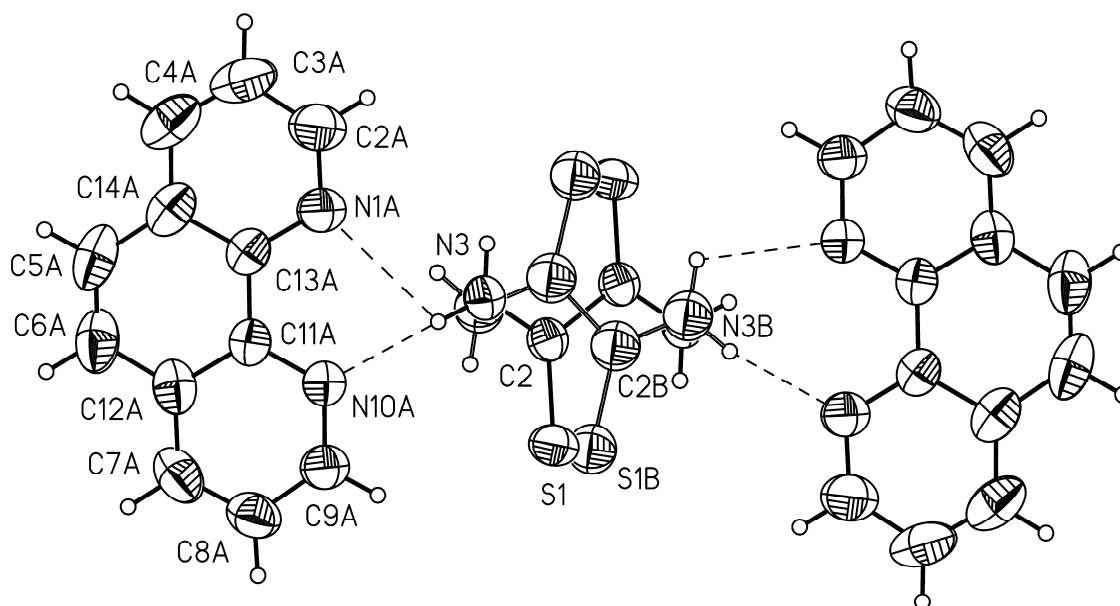

Fig. 7s Ortep drawing of **dtox·6** with displacement ellipsoids shown at the 50% probability level
